# Supplementary material for: Cocrystallization with a clip-type molecule catcher: a new method to determine structures of liquid molecules
Source: Royal Society of Chemistry journal article supplement (doi:10.1039/c9qo01526d), 2020-01-01
Supplement: c9qo01526d1.pdf [file c9qo01526d1.pdf]

## Cocrystallization with a clip-type molecule catcher: a novel method to determine structures of liquid molecules

Yuezhou Liu, Panpan Chen, Bingbing Shi, Tianyu Jiao, Huaqiang Ju, Peiren Liu and Feihe Huang\*

*State Key Laboratory of Chemical Engineering, Center for Chemistry of High-Performance & Novel Materials, Department of Chemistry, Zhejiang University, Hangzhou 310027, P. R. China*

*Fax and Tel: +86-571-8795-3189; Email address: [fhuang@zju.edu.cn](mailto:fhuang@zju.edu.cn)*

|                                                                                                                 |     |
|-----------------------------------------------------------------------------------------------------------------|-----|
| 1. <i>Materials and instrumentations</i>                                                                        | S2  |
| 2. <i>Synthesis and characterization of compounds</i>                                                           | S2  |
| 3. <i>Crystallographic data for the molecular clip 1</i>                                                        | S6  |
| 4. <i>Association constant and stoichiometry determination for the complexation between 1 and 4-nitrophenol</i> | S12 |
| 5. <i>Crystallographic data for the host–guest complex of 1 and 4-nitrophenol</i>                               | S13 |
| 6. <i>Association constant for the complexation between 1 and TNP</i>                                           | S16 |
| 7. <i>Crystallographic data for the host–guest complex of 1 and TNP</i>                                         | S17 |
| 8. <i>Crystallographic data for the molecule catcher toward liquid molecules</i>                                | S19 |
| 9. <i>The host–guest complexation between 1 and liquid molecules</i>                                            | S25 |
| 10. <i>References</i>                                                                                           | S27 |

## 1. Materials and instrumentations

All reagents were commercially available and used as supplied without further purification. Compounds **4** and **7** were prepared according to previous work.<sup>[S1,S2]</sup> <sup>1</sup>H NMR, <sup>13</sup>C NMR and NOESY spectra were recorded with an Agilent 600 MHz DirectDrive2 instrument with use of the deuterated solvent as the lock and the residual solvent or TMS as the internal reference. High-resolution mass spectrometric (HRMS) experiments were performed with a Bruker 7-Tesla FT-ICR mass spectrometer equipped with an electrospray source (Billerica, MA, USA). Single crystal X-ray data sets were obtained on an Oxford Diffraction Xcalibur Atlas Gemini captra instrument.

## 2. Synthesis and characterizations of compounds

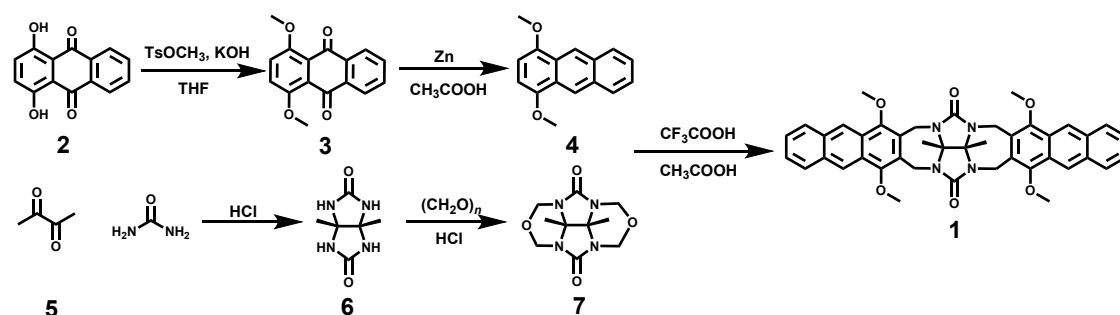

Scheme S1. Synthetic route to molecular clip **1**.

**Synthesis of compound 4.** 1,4-Dimethoxyanthracene **4** was synthesized according to our previous work.<sup>[S1]</sup> The <sup>1</sup>H NMR spectrum of molecule **4** is shown in Figure S1. <sup>1</sup>H NMR (600 MHz, CDCl<sub>3</sub>, 298 K)  $\delta$  (ppm): 8.77 (s, 2 H), 8.02–8.04 (m, 2 H), 7.46–7.48 (m, 2 H), 6.61 (s, 2 H), 4.04 (s, 6 H).

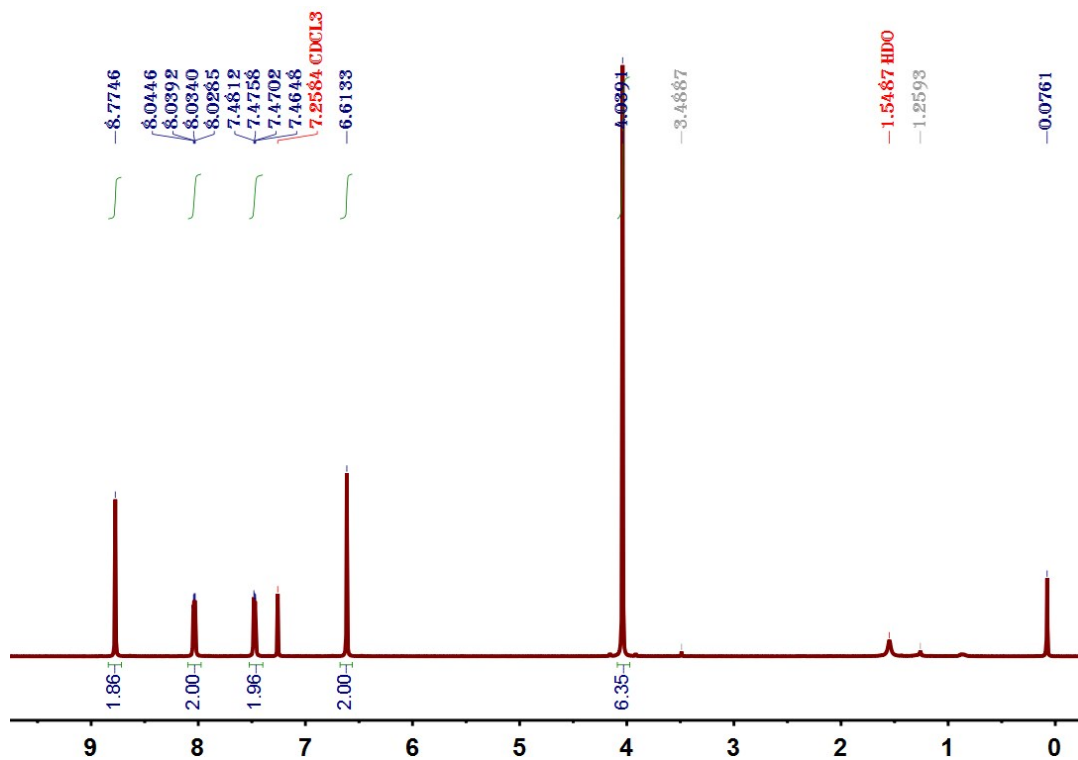

**Figure S1**  $^1\text{H}$  NMR spectrum (600 MHz,  $\text{CDCl}_3$ , 298 K) of **4**.

**Synthesis of compound 7.** Compound **7** was prepared according to previous work.<sup>[S2]</sup> The  $^1\text{H}$  NMR spectrum of **7** is shown in Figure S2.  $^1\text{H}$  NMR (600 MHz,  $\text{DMSO}-d_6$ , 298 K)  $\delta$  (ppm): 5.20–5.21 (d,  $J = 12$  Hz, 4 H), 4.98–5.00 (d,  $J = 12$  Hz, 4 H), 1.80 (s, 6 H).

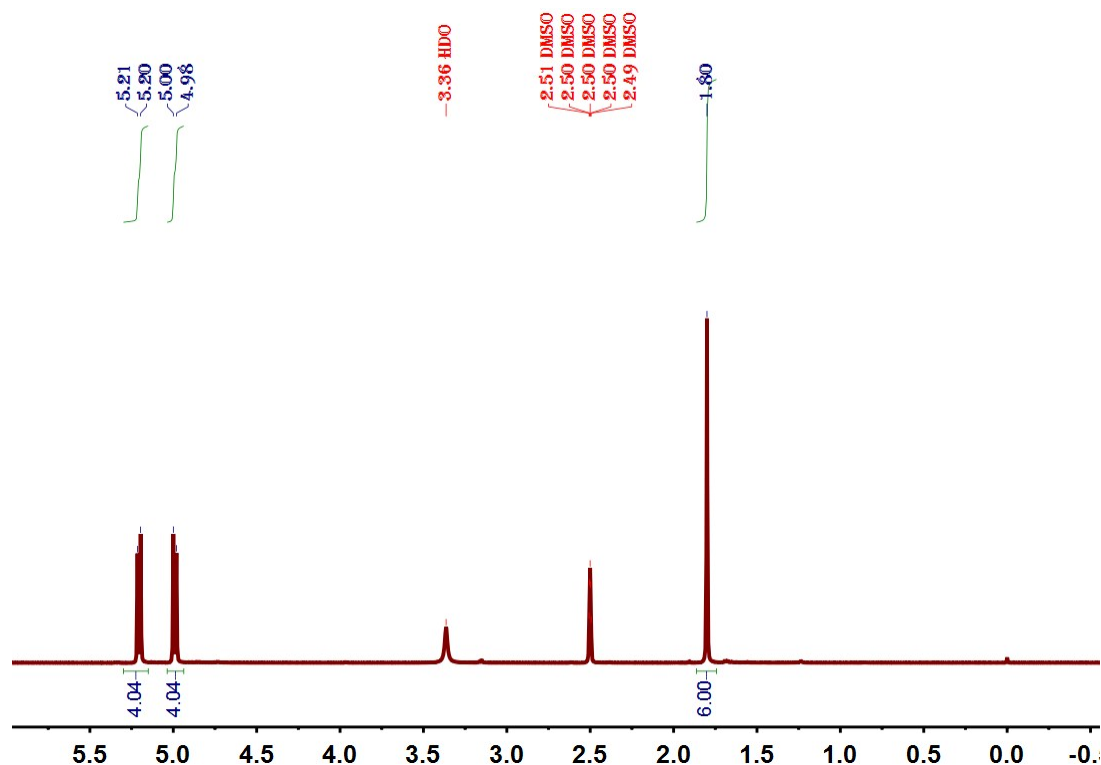

**Figure S2**  $^1\text{H}$  NMR spectrum (600 MHz,  $\text{DMSO-}d_6$ , 298 K) of **7**.

**Synthesis of molecular clip 1.** To a 25 mL round bottom flask, 1,4-dimethoxyanthracene (**4**, 1.00 g, 4.20 mmol), compound **7** (0.51g, 2.00 mmol), 10.0 mL of HOAc and 10.0 mL of  $\text{CF}_3\text{COOH}$  were added. The reaction mixture was stirred at 90 °C for 2 hours. After precipitation by the addition of 100 mL of methyl alcohol, the solid was filtered and purified by column chromatography on silica gel using a mixture of petroleum ether and ethyl acetate ( $v : v = 1 : 2$ ) as the eluent to give 1.14 g (82% yield) of **1** as a pale yellow solid. Mp: over 330 °C. The  $^1\text{H}$  NMR spectrum of compound **1** is shown in Figure S3.  $^1\text{H}$  NMR (600 MHz,  $\text{CDCl}_3$ , 298 K)  $\delta$  (ppm): 8.50 (s, 4 H), 7.91–7.94 (m, 4 H), 7.39–7.42 (m, 4 H), 5.67–5.70 (d,  $J = 18$  Hz, 4 H), 4.12–4.15 (d,  $J = 18$  Hz, 4 H), 4.06 (s, 12 H), 1.86 (s, 6 H). The  $^{13}\text{C}$  NMR spectrum of **1** is shown in Figure S4.  $^{13}\text{C}$  NMR (150 MHz,  $\text{CDCl}_3$ , 298 K)  $\delta$  (ppm): 158.5, 152.7, 134.3, 131.0, 129.3, 128.5, 128.1, 124.8, 65.7, 39.5, 19.8. The HR ESI-MS of **1** is shown in Figure S5:  $m/z$  calcd for  $[\text{M}+\text{H}^+]$   $\text{C}_{42}\text{H}_{39}\text{O}_6\text{N}_4^+$ , 695.2864; Found 695.2843, error 3.0 ppm.

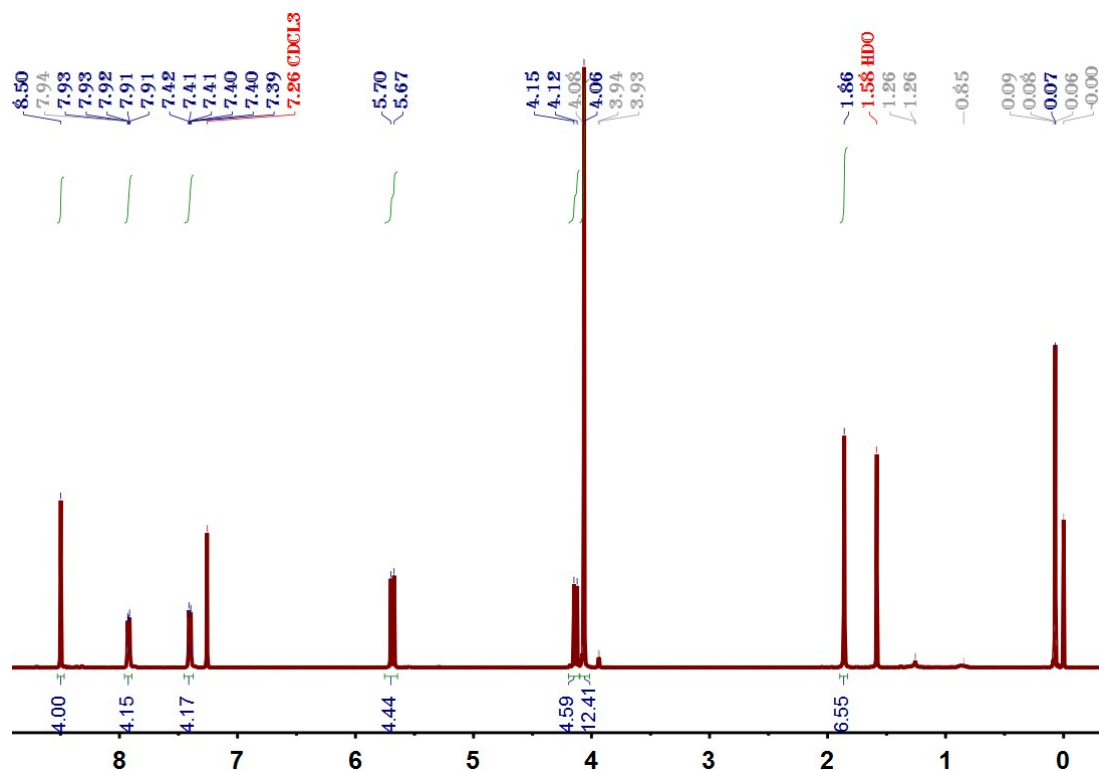

Figure S3 <sup>1</sup>H NMR spectrum (600 MHz, CDCl<sub>3</sub>, 298 K) of 1.

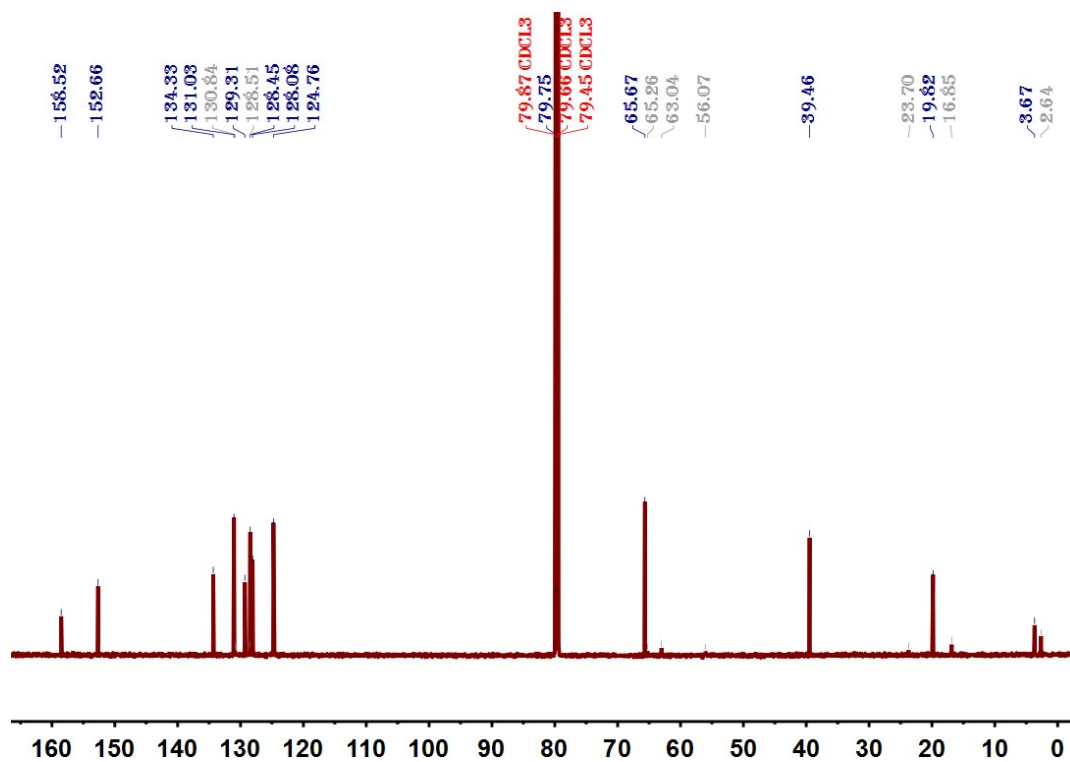

Figure S4 <sup>13</sup>C NMR spectrum (150 MHz, CDCl<sub>3</sub>, 298 K) of 1.

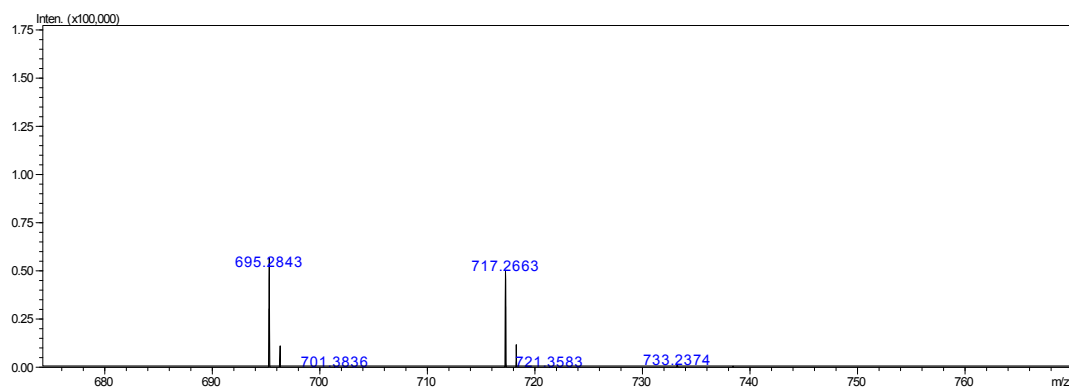

**Figure S5** HR ESI-MS spectrum of compound **1** in CHCl<sub>3</sub>.

### 3. Crystallographic Data for the molecular clip **1**

Methods to get single crystals of molecular clip **1** suitable for X-ray analysis:

#### **1**•(CH<sub>3</sub>CN)

**1** (10 mg) was dissolved in acetonitrile to make a hot saturated acetonitrile solution, and the solution was allowed to evaporate slowly at room temperature to afford faint yellow crystals within 6 hours.

#### **1**•(CHCl<sub>3</sub>)

**1** (10 mg) was dissolved in a mixture of chloroform/*n*-hexane (*v* : *v* = 2 : 1), and faint yellow crystals were obtained within 12 hours by slow evaporation.

**Table S1.** Experimental single crystal X-ray data for **1**•(CH<sub>3</sub>CN) and **1**•(CHCl<sub>3</sub>)

| Formula                         | <b>1</b> •(CH <sub>3</sub> CN)                                | <b>1</b> •(CHCl <sub>3</sub> )                                                |
|---------------------------------|---------------------------------------------------------------|-------------------------------------------------------------------------------|
| Crystallization Solvent         | acetonitrile                                                  | chloroform/ <i>n</i> -hexane<br>( <i>v</i> : <i>v</i> = 2 : 1)                |
| Collection Temperature          | 173 K                                                         | 173 K                                                                         |
| Formula                         | C <sub>48</sub> H <sub>47</sub> N <sub>7</sub> O <sub>6</sub> | C <sub>43</sub> H <sub>39</sub> Cl <sub>3</sub> N <sub>4</sub> O <sub>6</sub> |
| <i>Mr</i>                       | 817.92                                                        | 814.13                                                                        |
| Crystal Size [mm <sup>3</sup> ] | 0.15 × 0.12 × 0.08                                            | 0.15 × 0.1 × 0.08                                                             |
| Crystal System                  | monoclinic                                                    | Triclinic                                                                     |
| Space Group                     | P2 <sub>1</sub> /n                                            | P-1                                                                           |

|                                                       |                |                |
|-------------------------------------------------------|----------------|----------------|
| $a$ [Å]                                               | 14.1397(3)     | 9.4017(2)      |
| $b$ [Å]                                               | 17.9442(4)     | 11.9309(3)     |
| $c$ [Å]                                               | 17.0478(4)     | 16.8327(4)     |
| $\alpha$ [°]                                          | 90             | 95.0320(10)    |
| $\beta$ [°]                                           | 107.0650(10)   | 92.8350(10)    |
| $\gamma$ [°]                                          | 90             | 92.8780(10)    |
| $V$ [Å <sup>3</sup> ]                                 | 4135.02(16)    | 1875.73(8)     |
| $Z$                                                   | 4              | 2              |
| Dcalcd [g cm <sup>-3</sup> ]                          | 1.314          | 1.441          |
| $\mu$ [mm <sup>-1</sup> ]                             | 0.458          | 1.770          |
| F(000)                                                | 1728.0         | 848.0          |
| $2\theta$ range [°]                                   | 6.234 – 109.85 | 9.19 – 109.872 |
| Reflections collected                                 | 38333          | 22375          |
| Independent reflections, $R_{int}$                    | 7729, 0.0406   | 7014, 0.0421   |
| Data / restraints / parameters                        | 7729 / 0 / 559 | 7014 / 0 / 511 |
| Final $R1$ values ( $I > 2\sigma(I)$ )                | 0.0884         | 0.0645         |
| Final $R1$ values (all data)                          | 0.0972         | 0.0683         |
| Goodness-of-fit on $F^2$                              | 1.000          | 1.044          |
| Largest difference peak and hole [e.Å <sup>-3</sup> ] | 1.52 / -0.99   | 1.53 / -1.25   |
| CCDC                                                  | 1960289        | 1960287        |

---

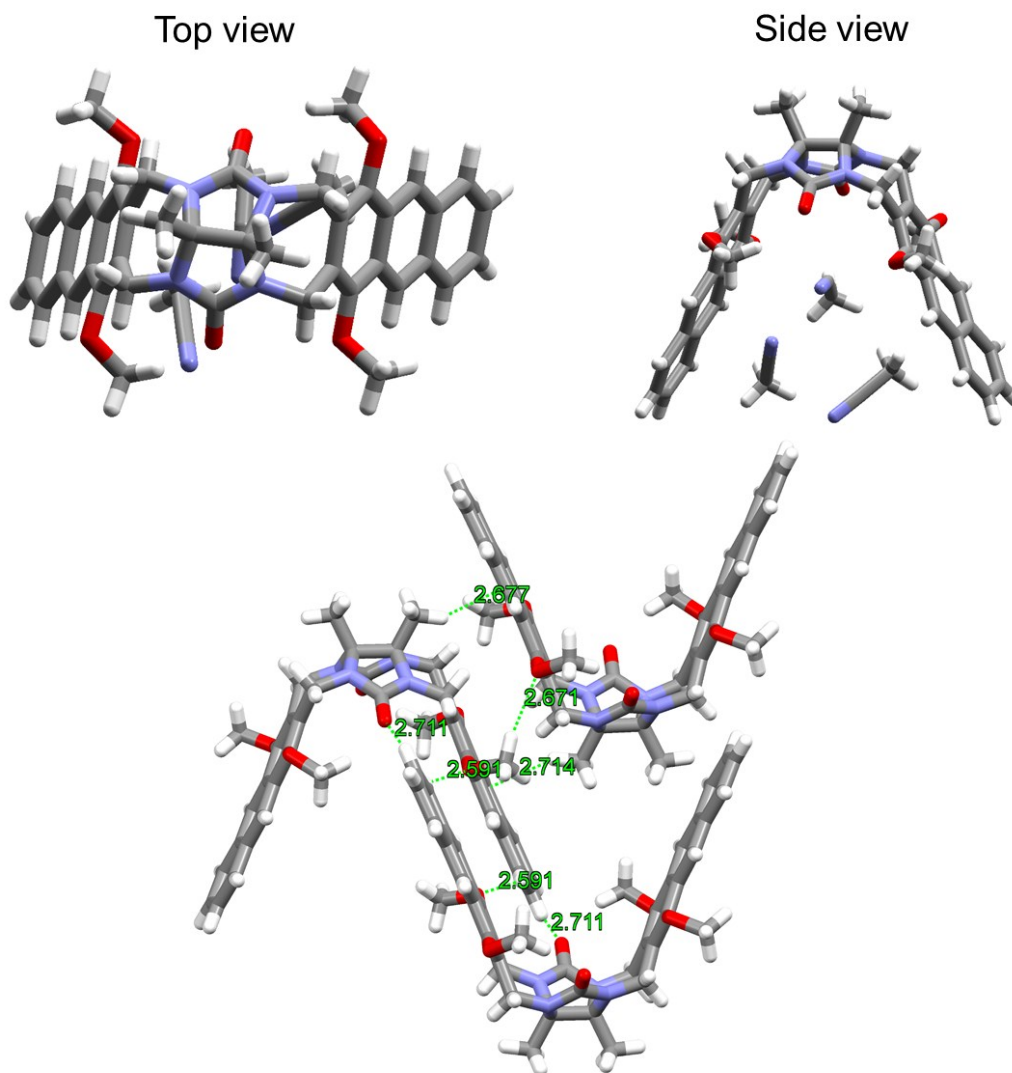

**Figure S6** Single crystal structure of **1**•(CH<sub>3</sub>CN). C gray, O red, H white, N blue. C–H··· $\pi$  interactions with H··· $\pi$ -plane distances of 2.677 and 2.714 Å; H···O distances for C–H···O interactions between two adjacent molecular clips (Å): 2.591, 2.711 and 2.671 Å.



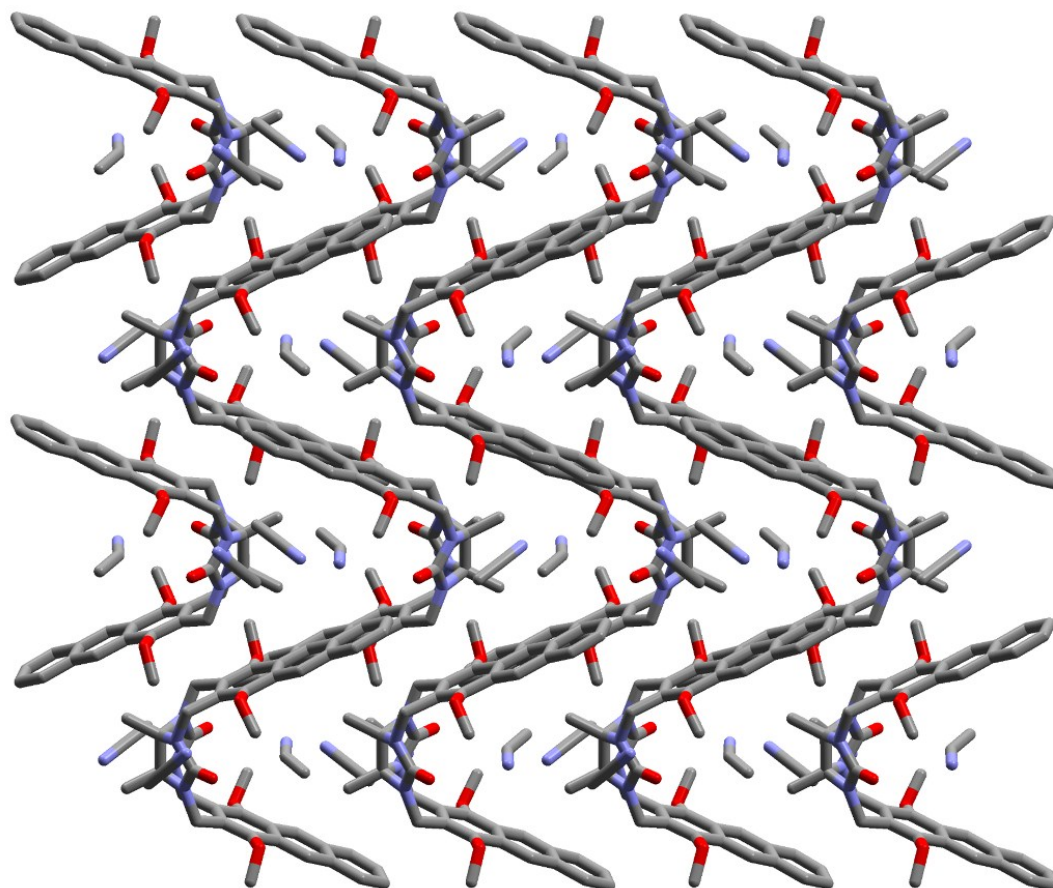

View along a axis

**Figure S7** The packing structure of **1•(CH<sub>3</sub>CN)**. Hydrogen atoms are omitted for clarity.

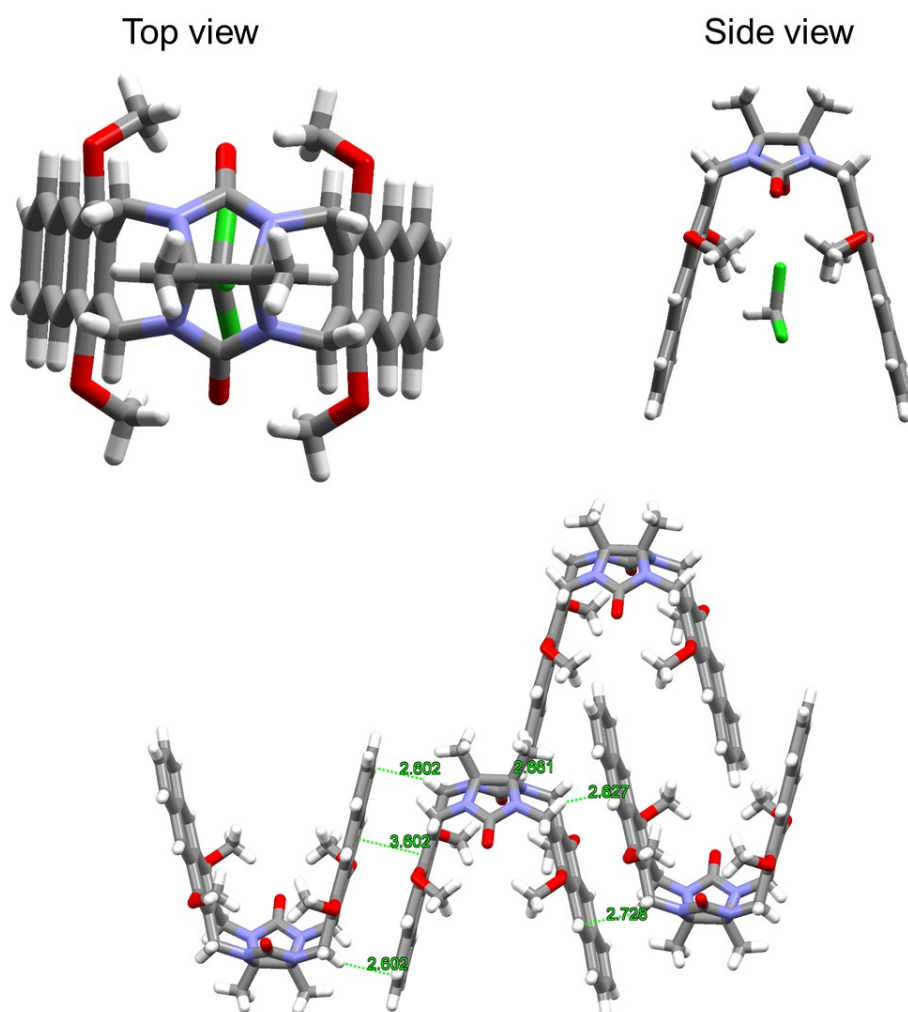

**Figure S8** Single crystal structure of **1**•(CHCl<sub>3</sub>). C gray, O red, H white, N blue, Cl green. Certain H atoms are omitted for clarity. C–H··· $\pi$  interactions with H··· $\pi$ -plane distances of 2.602, 2.728 and 2.627 Å; H···O distance for C–H···O interaction between two adjacent molecular clips (Å): 2.661; Face-to-face  $\pi$ -stacking parameters: centroid-centroid distance (Å): 3.602, ring plane/ring plane inclination (deg): 1.16.

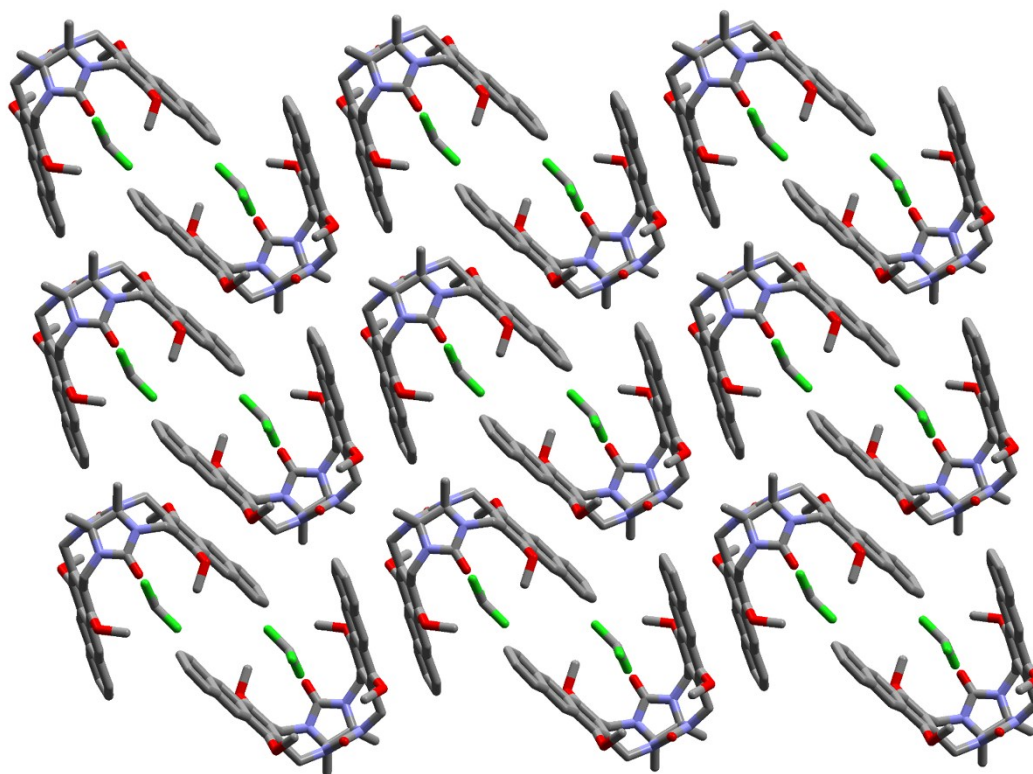

View along a axis

**Figure S9** The packing structure of **1**•(CHCl<sub>3</sub>). Hydrogen atoms are omitted for clarity.

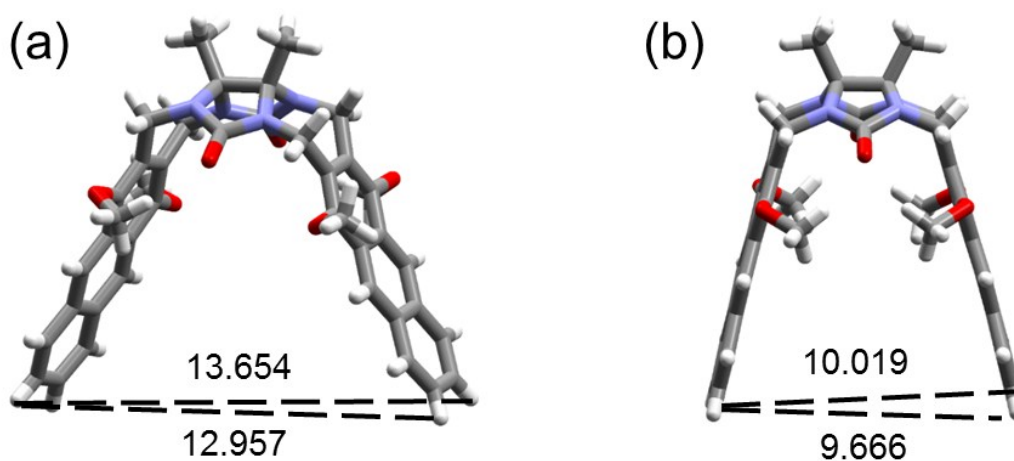

**Figure S10** (a) Single crystal structure of **1** based on crystallization in acetonitrile. (b) Single crystal structure of **1** based on crystallization in chloroform/*n*-hexane ( $\nu : \nu = 2 : 1$ ).

#### 4. Association constant and stoichiometry determination for the complexation between **1** and 4-nitrophenol

To determine the association constant and stoichiometry for the complexation between **1** and 4-nitrophenol, <sup>1</sup>H NMR titration was done with solutions which had a constant concentration of the molecular clip (1.00 mM) and varying concentrations of the guest 4-nitrophenol. By a non-linear curve-fitting method, the association constant ( $K_a$ ) was determined. By a mole ratio plot, 1 : 1 stoichiometry was obtained for the complexation between **1** and 4-nitrophenol.

The non-linear curve-fitting was based on a previous report.<sup>S3</sup>

$$\Delta\delta = (\Delta\delta_\infty / [H]_0) (0.5[G]_0 + 0.5([H]_0 + 1/K_a) - (0.5 ([G]_0^2 + (2[G]_0 (1/K_a - [H]_0) + (1/K_a + [H]_0)^2)^{0.5})) \dots\dots\dots(S1)$$

where  $\Delta\delta$  is the chemical shift change of  $H_a$  on the compound **1**,  $\Delta\delta_\infty$  is the chemical shift change of  $H_a$  when the molecular clip is completely complexed,  $[G]_0$  is the initial concentration of the guest 4-nitrophenol, and  $[H]_0$  is the fixed initial concentration of the compound **1**.

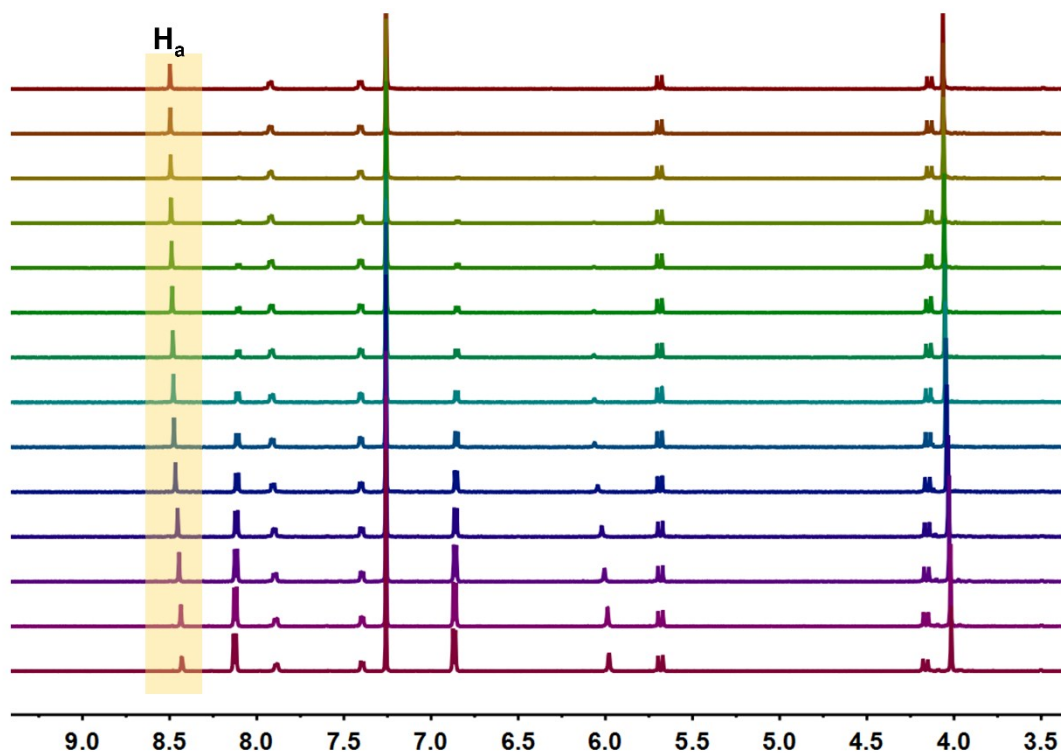

**Figure S11** Partial  $^1\text{H}$  NMR spectra (600 MHz,  $\text{CDCl}_3$ , 298 K) of molecular clip **1** at a concentration of 1.00 mM upon addition of various concentrations of 4-nitrophenol: 0.000 mM, 0.100 mM, 0.200 mM, 0.380 mM, 0.570 mM, 0.820 mM, 1.07 mM, 1.38 mM, 1.67 mM, 2.31 mM, 3.33 mM, 4.11 mM, 5.24 mM, and 6.31 mM from up to bottom.

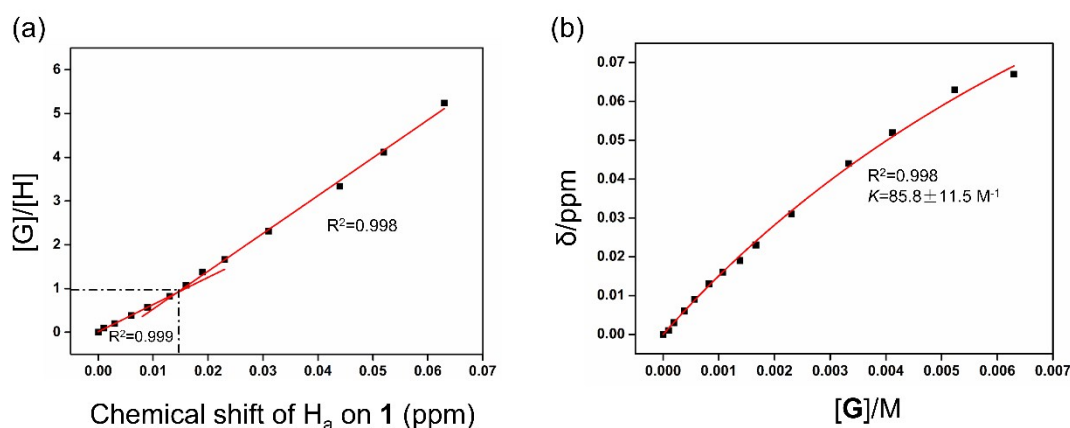

**Figure S12** (a) Mole ratio plot for molecular clip **1** and 4-nitrophenol, indicating a 1:1 stoichiometry. (b) The chemical shift changes of  $\text{H}_a$  on **1** upon addition of 4-nitrophenol. The red solid line was obtained from the non-linear curve-fitting using Eq. S1.

### 5. Crystallographic data for the host–guest complex of **1** and 4-nitrophenol

Method to get single crystals of the host–guest complex of **1** and 4-nitrophenol:

A mixture of **1** (10 mg) and 4-nitrophenol (5 mg) was dissolved in a mixture of chloroform and hexane ( $v : v = 2 : 1$ ). The solution was allowed to evaporate slowly at room temperature to afford faint yellow single crystals.

**Table S2.** Experimental single crystal X-ray data for **1**⊂4-nitrophenol

|                         |                         |
|-------------------------|-------------------------|
| Formula                 | <b>1</b> ⊂4-nitrophenol |
| Crystallization Solvent | chloroform              |
| Collection Temperature  | 173 K                   |

|                                                                          |                                                                               |
|--------------------------------------------------------------------------|-------------------------------------------------------------------------------|
| Formula                                                                  | C <sub>49</sub> H <sub>44</sub> Cl <sub>3</sub> N <sub>5</sub> O <sub>9</sub> |
| <i>Mr</i>                                                                | 953.24                                                                        |
| Crystal Size [mm]                                                        | 0.1 × 0.03 × 0.02                                                             |
| Crystal System                                                           | triclinic                                                                     |
| Space Group                                                              | P-1                                                                           |
| <i>a</i> [Å]                                                             | 10.3707(5)                                                                    |
| <i>b</i> [Å]                                                             | 12.8735(7)                                                                    |
| <i>c</i> [Å]                                                             | 17.6390(9)                                                                    |
| $\alpha$ [°]                                                             | 71.233(3)                                                                     |
| $\beta$ [°]                                                              | 81.025(4)                                                                     |
| $\gamma$ [°]                                                             | 80.639(3)                                                                     |
| <i>V</i> [Å <sup>3</sup> ]                                               | 2186.5(2)                                                                     |
| <i>Z</i>                                                                 | 2                                                                             |
| <i>D</i> <sub>calcd</sub> [g cm <sup>-3</sup> ]                          | 1.448                                                                         |
| $\mu$ [mm <sup>-1</sup> ]                                                | 1.614                                                                         |
| F(000)                                                                   | 992.0                                                                         |
| 2 $\theta$ range [°]                                                     | 6.354 – 110.14                                                                |
| Reflections collected                                                    | 31289                                                                         |
| Independent reflections, <i>R</i> <sub>int</sub>                         | 8221, 0.0634                                                                  |
| Data / restraints / parameters                                           | 8221 / 0 / 603                                                                |
| Final <i>R</i> <sub>1</sub> values ( <i>I</i> > 2 $\sigma$ ( <i>I</i> )) | 0.1144                                                                        |
| Final <i>R</i> <sub>1</sub> values (all data)                            | 0.1514                                                                        |
| Goodness-of-fit on <i>F</i> <sup>2</sup>                                 | 1.310                                                                         |
| Largest difference peak and hole<br>[e.Å <sup>-3</sup> ]                 | 1.96 / -1.31                                                                  |
| CCDC                                                                     | 1960290                                                                       |

---

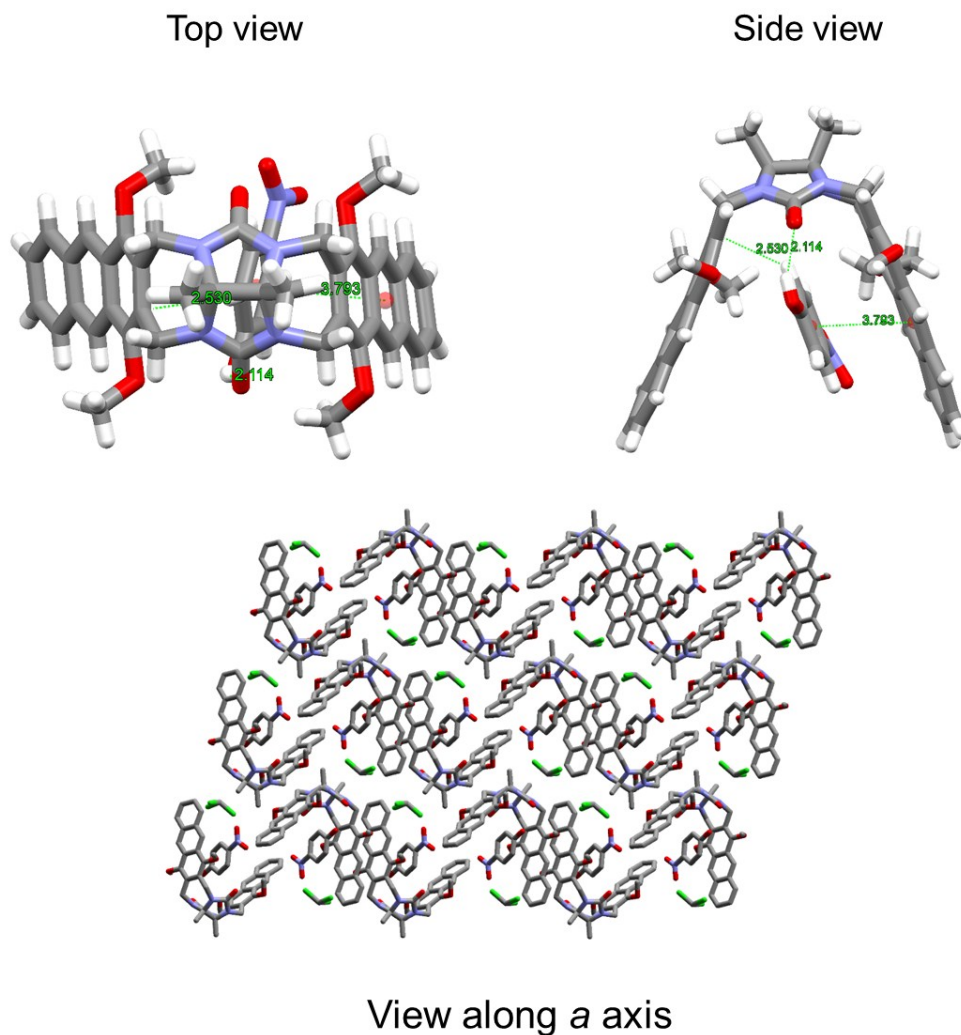

**Figure S13** Single crystal structure of **1□4-nitrophenol**. C gray, O red, H white, N blue, Cl green. Certain H atoms are omitted for clarity. C–H··· $\pi$  interaction with H··· $\pi$ -plane distance of 2.530 Å; H···O distance for the C–H···O interaction between the hydrogen atom on the phenolic hydroxyl group of 4-nitrophenol and the carbonyl oxygen atom on the spacer (Å): 2.114; Face-to-face  $\pi$ -stacking parameters: centroid-centroid distance (Å): 3.793, ring plane/ring plane inclination (deg): 15.35.

## 6. Association constant for the complexation between **1** and TNP

To determine the association constant and stoichiometry for the complexation between **1** and TNP,  $^1\text{H}$  NMR titration was done with solutions which had a constant concentration of the molecular clip (1.00 mM) and varying concentrations of the guest 4-nitrophenol.

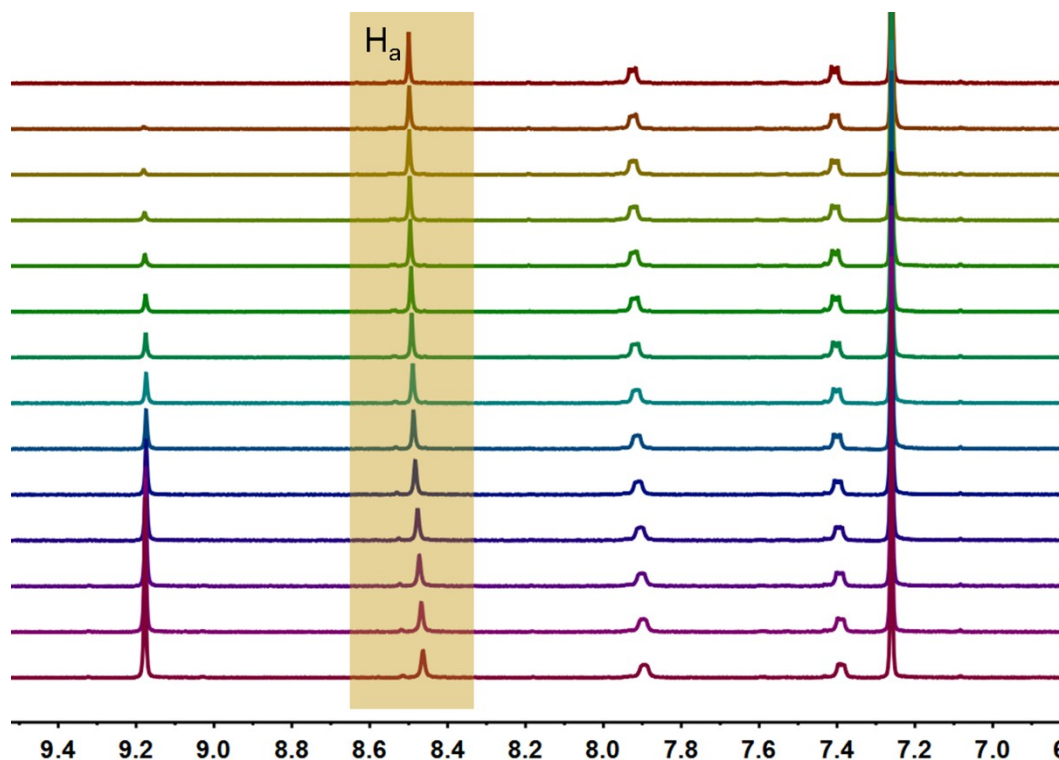

**Figure S14** Partial  $^1\text{H}$  NMR spectra (600 MHz,  $\text{CDCl}_3$ , 298 K) of molecular clip **1** at a concentration of 1.00 mM upon addition of various concentrations of TNP: 0.00 mM, 0.10 mM, 0.20 mM, 0.38 mM, 0.57 mM, 0.82 mM, 1.07 mM, 1.38 mM, 1.67 mM, 2.31 mM, 3.33 mM, 4.11 mM, 5.24 mM, and 6.31 mM from up to bottom.



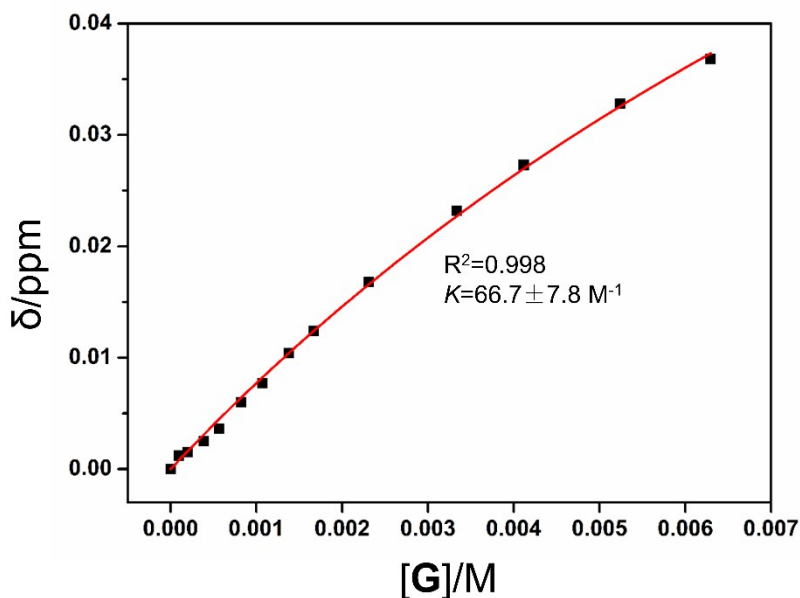

**Figure S15** The chemical shift changes of H<sub>a</sub> on **1** upon addition of TNP. The red solid line was obtained from the non-linear curve-fitting using Eq. S1.

### 7. Crystallographic data for the host–guest complex of **1** and TNP

Method to get single crystals of the host–guest complex of **1** and TNP:

A mixture of **1** (10 mg) and TNP (5 mg) was dissolved in a mixture of chloroform and hexane ( $v : v = 2 : 1$ ). The solution was allowed to evaporate slowly at room temperature to afford reddish black single crystals.

**Table S3.** Experimental single crystal X-ray data for the complex of **1** and TNP

| Formula                 | <b>1</b> □TNP                                                                   |
|-------------------------|---------------------------------------------------------------------------------|
| Crystallization Solvent | chloroform                                                                      |
| Collection Temperature  | 173 K                                                                           |
| Formula                 | C <sub>49</sub> H <sub>42</sub> Cl <sub>13</sub> N <sub>7</sub> O <sub>13</sub> |
| <i>Mr</i>               | 1043.24                                                                         |
| Crystal Size [mm]       | 0.08 × 0.06 × 0.05                                                              |
| Crystal System          | monoclinic                                                                      |
| Space Group             | P2 <sub>1</sub> /c                                                              |

|                                                          |                 |
|----------------------------------------------------------|-----------------|
| $a$ [Å]                                                  | 9.2666(5)       |
| $b$ [Å]                                                  | 26.6723(14)     |
| $c$ [Å]                                                  | 18.5536(9)      |
| $\alpha$ [°]                                             | 90              |
| $\beta$ [°]                                              | 101.541(2)      |
| $\gamma$ [°]                                             | 90              |
| $V$ [Å <sup>3</sup> ]                                    | 4493.0(4)       |
| $Z$                                                      | 4               |
| Dcalcd [g cm <sup>-3</sup> ]                             | 1.542           |
| $\mu$ [mm <sup>-1</sup> ]                                | 1.659           |
| F(000)                                                   | 2160.0          |
| $2\theta$ range [°]                                      | 7.152 – 110.086 |
| Reflections collected                                    | 8322            |
| Independent reflections                                  | 8322            |
| Data / restraints / parameters                           | 8322 / 0 / 657  |
| Final $R1$ values ( $I > 2\sigma(I)$ )                   | 0.0626          |
| Final $R1$ values (all data)                             | 0.0739          |
| Goodness-of-fit on $F2$                                  | 1.022           |
| Largest difference peak and hole<br>[e.Å <sup>-3</sup> ] | 0.75 / -0.65    |
| CCDC                                                     | 1960292         |

---

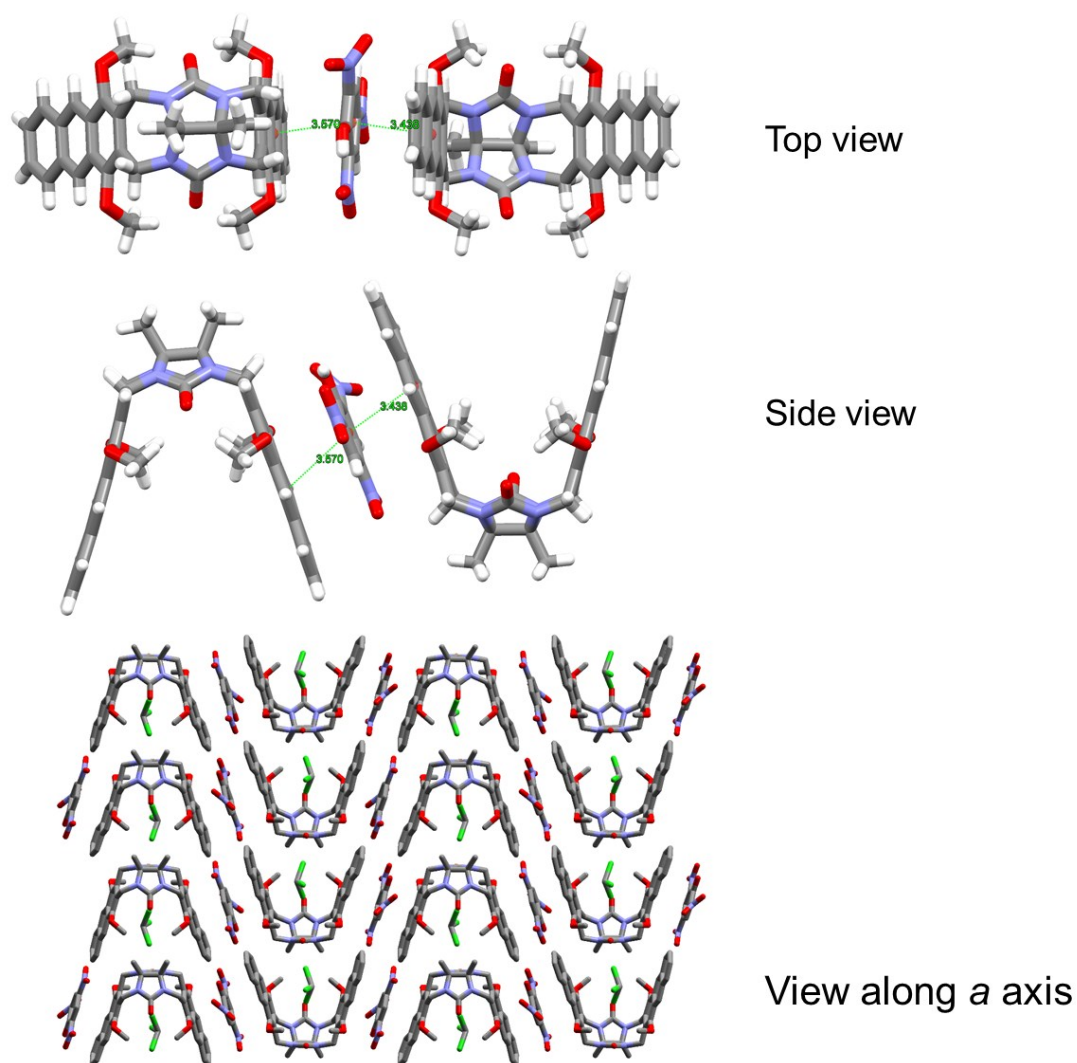

**Figure S16** Single crystal structure of the complex of **1** and TNP. C gray, O red, H white, N blue, Cl green. Certain H atoms are omitted for clarity. The anthracene ring and TNP are connected by strong charge-transfer interactions, and the distances between anthracene ring and TNP are 3.570 and 3.438 Å.

### **8. Crystallographic data for the molecule catcher toward liquid molecules**

Methods to get single crystals of the complex of molecular clip **1** and selected liquid molecules fitted to X-ray analysis:

A mixture of **1** (10 mg) and a selected liquid molecule (10 mg) was dissolved in  $\text{CHCl}_3$  (0.8 mL), and solution was allowed to evaporate slowly at room temperature. Crystals formed within 24 hours.

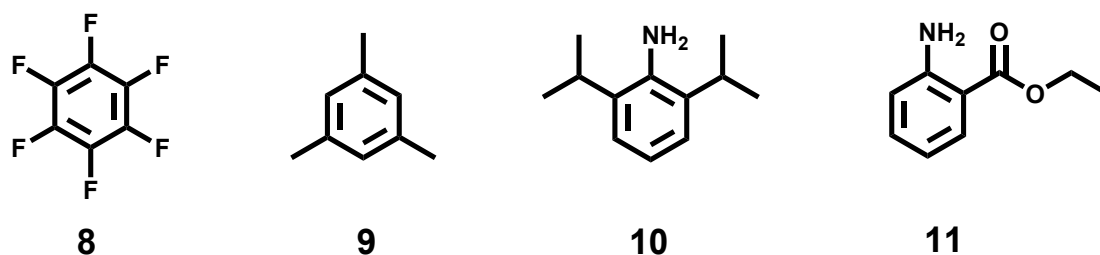

**Scheme 2** The chemical structure of selected liquid molecules.

**Table S3.** Experimental single crystal X-ray data for **1•8** and **1•9**

| Formula                                          | <b>1•8</b>                                                                   | <b>1•9</b>                                                    |
|--------------------------------------------------|------------------------------------------------------------------------------|---------------------------------------------------------------|
| Crystallization Solvent                          | chloroform                                                                   | chloroform                                                    |
| Collection Temperature                           | 173 K                                                                        | 173 K                                                         |
| Formula                                          | C <sub>48</sub> H <sub>38</sub> F <sub>6</sub> N <sub>4</sub> O <sub>6</sub> | C <sub>51</sub> H <sub>50</sub> N <sub>4</sub> O <sub>6</sub> |
| <i>Mr</i>                                        | 880.82                                                                       | 814.95                                                        |
| Crystal Size [mm]                                | 0.1 × 0.08 × 0.05                                                            | 0.12 × 0.08 × 0.06                                            |
| Crystal System                                   | monoclinic                                                                   | Triclinic                                                     |
| Space Group                                      | C2/c                                                                         | P-1                                                           |
| <i>a</i> [Å]                                     | 16.0417(3)                                                                   | 10.2940(4)                                                    |
| <i>b</i> [Å]                                     | 18.6338(3)                                                                   | 13.4087(5)                                                    |
| <i>c</i> [Å]                                     | 13.7075(2)                                                                   | 16.3447(7)                                                    |
| $\alpha$ [°]                                     | 90                                                                           | 81.024(2)                                                     |
| $\beta$ [°]                                      | 99.4420(10)                                                                  | 80.676(2)                                                     |
| $\gamma$ [°]                                     | 90                                                                           | 69.255(2)                                                     |
| <i>V</i> [Å <sup>3</sup> ]                       | 4041.90(12)                                                                  | 2069.98(15)                                                   |
| <i>Z</i>                                         | 4                                                                            | 2                                                             |
| D <sub>calcd</sub> [g cm <sup>-3</sup> ]         | 1.447                                                                        | 1.308                                                         |
| $\mu$ [mm <sup>-1</sup> ]                        | 0.624                                                                        | 0.443                                                         |
| F(000)                                           | 1824.0                                                                       | 864.0                                                         |
| 2 $\theta$ range [°]                             | 6.376 – 109.934                                                              | 8.044 – 109.972                                               |
| Reflections collected                            | 21172                                                                        | 20300                                                         |
| Independent reflections, <i>R</i> <sub>int</sub> | 3806, 0.0359                                                                 | 7603, 0.0604                                                  |

|                                                                |               |               |
|----------------------------------------------------------------|---------------|---------------|
| Data / restraints / parameters                                 | 3806 / 0 /292 | 7603 / 0 /559 |
| Final $R1$ values ( $I > 2\sigma(I)$ )                         | 0.0520        | 0.0616        |
| Final $R1$ values (all data)                                   | 0.0614        | 0.0771        |
| Goodness-of-fit on $F2$                                        | 1.056         | 1.070         |
| Largest difference peak and hole [ $e \cdot \text{\AA}^{-3}$ ] | 0.30 / -0.35  | 0.48 / -0.34  |
| CCDC                                                           | 1960293       | 1960288       |

**Table S4.** Experimental single crystal X-ray data for **1•10** and **1•11**

| Formula                                  | <b>1•10</b>        | <b>1•11</b>        |
|------------------------------------------|--------------------|--------------------|
| Crystallization Solvent                  | chloroform         | chloroform         |
| Collection Temperature                   | 173K               | 173 K              |
| Formula                                  | C59.5H57N6O6       | C51H49N5O8         |
| $M_r$                                    | 952.11             | 859.95             |
| Crystal Size [mm]                        | 0.08 × 0.06 × 0.02 | 0.05 × 0.03 × 0.02 |
| Crystal System                           | triclinic          | Triclinic          |
| Space Group                              | P-1                | P-1                |
| $a$ [Å]                                  | 10.4161(2)         | 10.6881(3)         |
| $b$ [Å]                                  | 14.2726(3)         | 14.5217(4)         |
| $c$ [Å]                                  | 18.0403(4)         | 16.4855(5)         |
| $\alpha$ [°]                             | 106.7040(10)       | 111.189(2)         |
| $\beta$ [°]                              | 91.8020(10)        | 91.323(2)          |
| $\gamma$ [°]                             | 100.7610(10)       | 101.864(2)         |
| $V$ [Å <sup>3</sup> ]                    | 2513.27(9)         | 2321.42(12)        |
| $Z$                                      | 2                  | 2                  |
| D <sub>calcd</sub> [g cm <sup>-3</sup> ] | 1.258              | 1.230              |
| $\mu$ [mm <sup>-1</sup> ]                | 0.422              | 0.438              |
| F(000)                                   | 1008.0             | 908.0              |
| $2\theta$ range [°]                      | 6.136 – 109.752    | 5.834 – 109.94     |

|                                                       |                  |                |
|-------------------------------------------------------|------------------|----------------|
| Reflections collected                                 | 22734            | 28109          |
| Independent reflections, <i>Rint</i>                  | 9191, 0.0411     | 8695, 0.0543   |
| Data / restraints / parameters                        | 9191 / 318 / 773 | 8695 / 0 / 585 |
| Final <i>R</i> 1 values ( $I > 2\sigma(I)$ )          | 0.0751           | 0.0652         |
| Final <i>R</i> 1 values (all data)                    | 0.1015           | 0.0957         |
| Goodness-of-fit on <i>F</i> 2                         | 1.061            | 1.055          |
| Largest difference peak and hole [e.Å <sup>-3</sup> ] | 0.94 / -0.37     | 0.29 / -0.32   |
| CCDC                                                  | 1960291          | 1960294        |

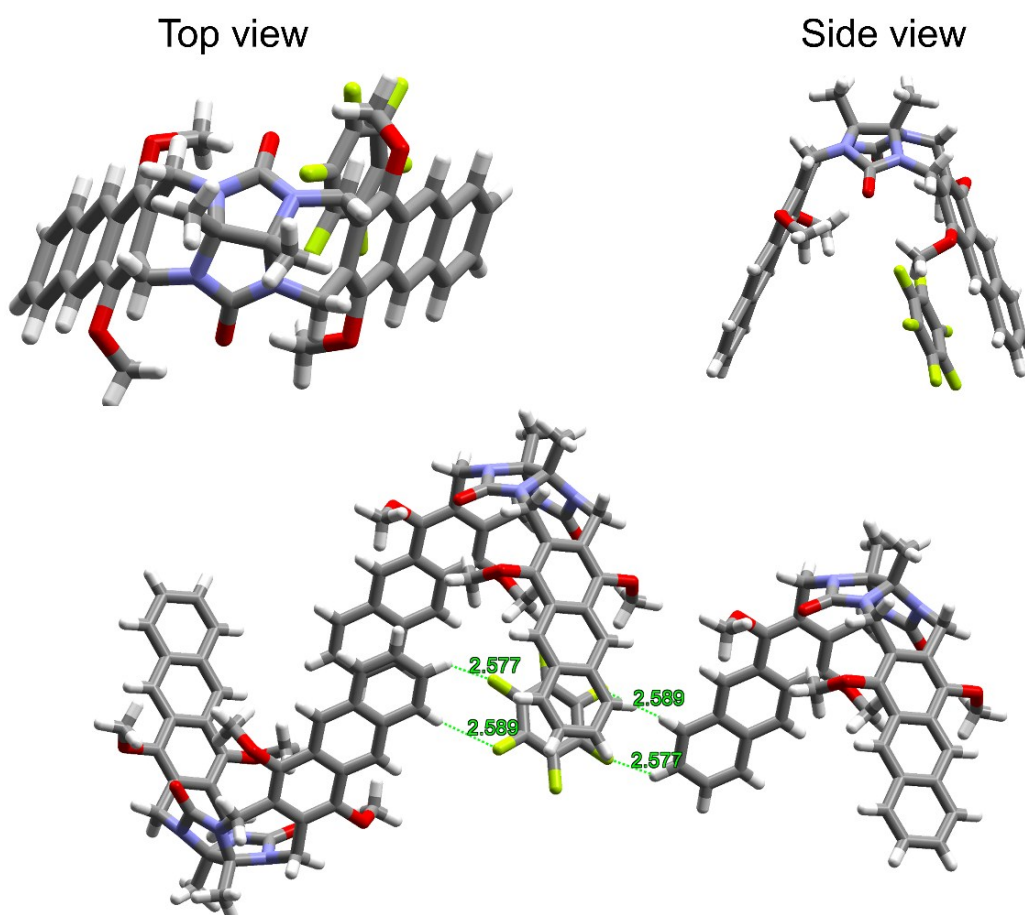

**Figure S17** Single crystal structure of **1•8**. C gray, O red, H white, N blue, F yellow. Certain H atoms are omitted for clarity. H $\cdots$ F distances for the C–H $\cdots$ F interactions between the fluorine atoms on **8** and the hydrogen atoms on the anthracene groups (Å): 2.577, 2.589.

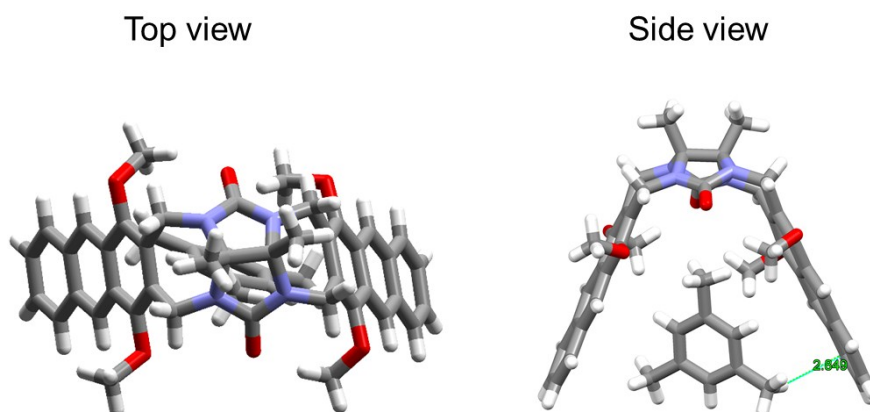

**Figure S18** Single crystal structure of **1•9**. C gray, O red, H white, N blue. C–H··· $\pi$  interaction with H··· $\pi$ -plane distance of 2.849 Å.

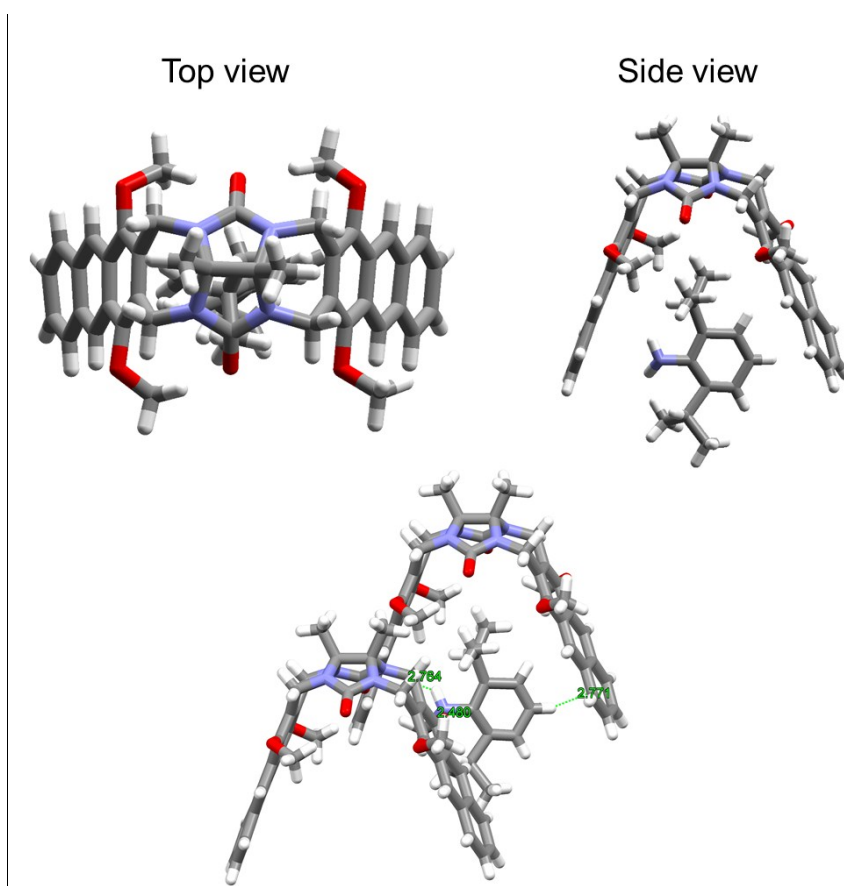

**Figure S19** Single crystal structure of **1•10**. C gray, O red, H white, N blue. C–H··· $\pi$  interaction with H··· $\pi$ -plane distance of 2.771 Å; N–H··· $\pi$  interaction with H··· $\pi$ -plane distance of 2.764 Å; H···N distance for the C–H···N interaction between the hydrogen atom on a methoxy group of molecular clip **1** and a nitrogen atom on amidogen of **10** (Å): 2.480.

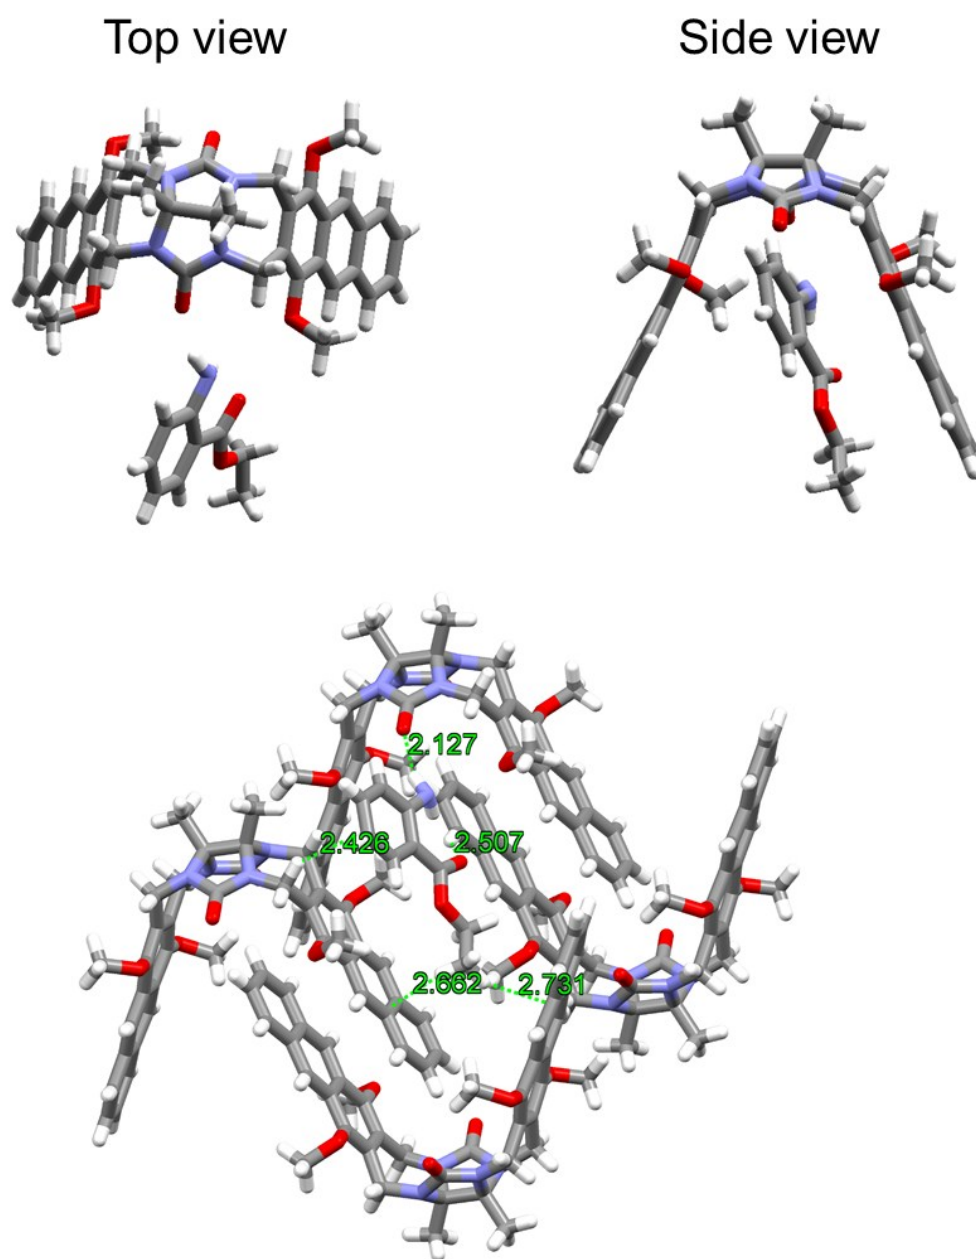

**Figure S20** Single crystal structure of **1•11**. C gray, O red, H white, N blue. C–H··· $\pi$  interaction with H··· $\pi$ -plane distance of 2.426, 2.662, 2.731 Å; H···O distance for the C–H···O interaction between an oxygen atom on **11** and a hydrogen atom on the anthracene group (Å): 2.507; H···O distance for the N–H···O interaction between an oxygen atom on the spacer and a hydrogen atom on **11** (Å): 2.127.



9. The host-guest complexation between **1** and selected liquid molecules

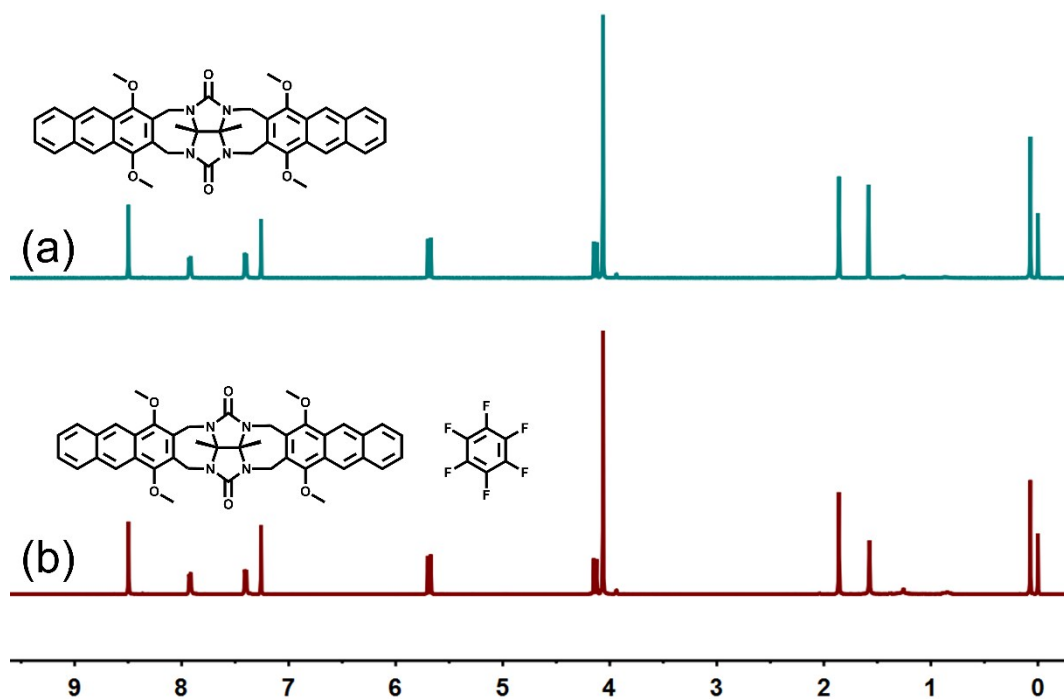

**Figure S21** Partial <sup>1</sup>H NMR spectra (600 MHz, 298 K) in CDCl<sub>3</sub>: (a) 5.00 mM **1**; (b) 5.00 mM **1** and 5.00 mM **8**.

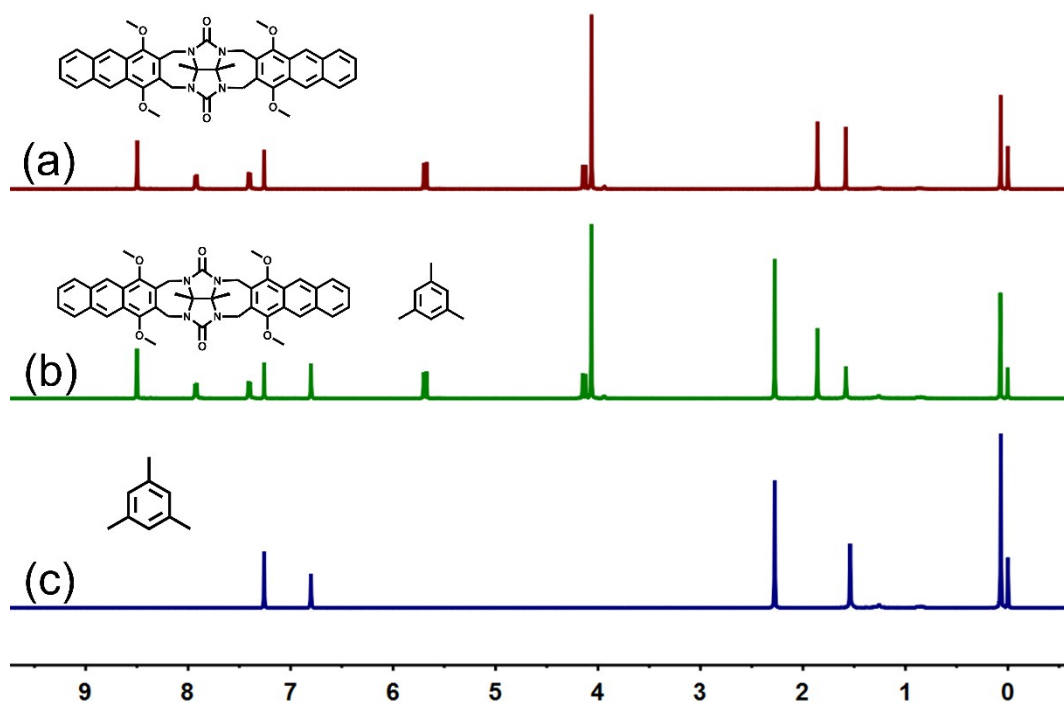

**Figure S22** Partial <sup>1</sup>H NMR spectra (600 MHz, 298 K) in CDCl<sub>3</sub>: (a) 5.00 mM **1**; (b) 5.00 mM **1** and 5.00 mM **9**; (c) 5.00 mM **9**.

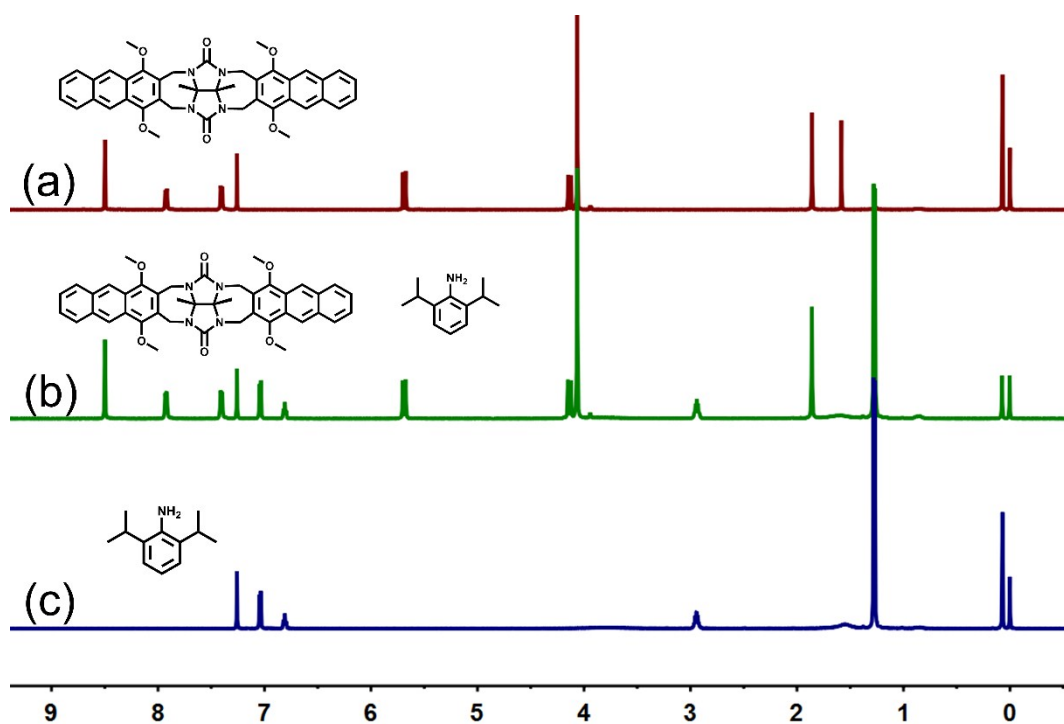

**Figure S23** Partial  $^1\text{H}$  NMR spectra (600 MHz, 298 K) in  $\text{CDCl}_3$ : (a) 5.00 mM **1**; (b) 5.00 mM **1** and 5.00 mM **10**; (c) 5.00 mM **10**.

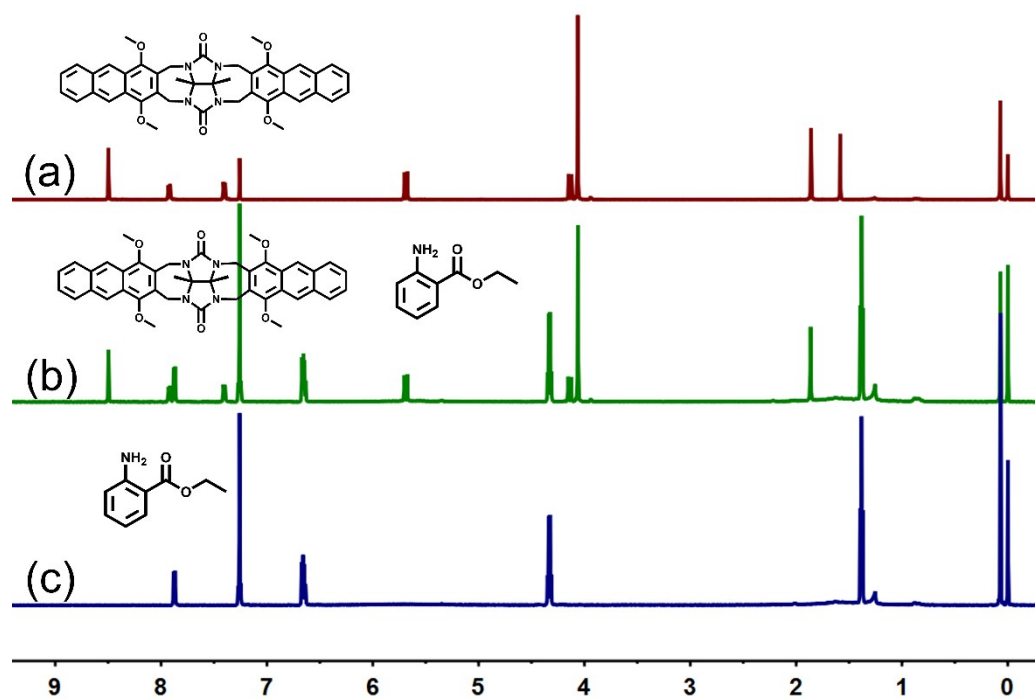

**Figure S24** Partial  $^1\text{H}$  NMR spectra (600 MHz, 298 K) in  $\text{CDCl}_3$ : (a) 5.00 mM **1**; (b) 5.00 mM **1** and 5.00 mM **11**; (c) 5.00 mM **11**.

## 10. References

- S1. B. Shi, Z. Li, Y. Liu, L. Shangguan, H. Zhu, H. Ju. *Tetrahedron Lett.* **2018**, *59*, 3477–3480.
- S2. D. Ma, G. Hettiarachchi, D. Nguyen, B. Zhang, J. B. Wittenberg, P. Y. Zavalij, V. Briken, L. Isaacs. *Nature Chem.* **2012**, *4*, 503–510.
- S3. P. R. Ashton, R. Ballardini, V. Balzani, M. Bělohradský, M. T. Gandolfi, D. Philp, L. Prodi, F. M. Raymo, M. V. Reddington, N. Spencer, J. F. Stoddart, M. Venturi, D. J. Williams. *J. Am. Chem. Soc.* **1996**, *118*, 4931–4951.
